# Supplementary material for: Novel 3D lanthanide-organic frameworks with an unusual infinite nanosized ribbon [Ln3(μ3–OH)2(–CO2)6]+n (Ln = Eu, Gd, Dy): syntheses, structures, luminescence, and magnetic properties
Source: Royal Society of Chemistry journal article supplement (doi:10.1039/c0ce00766h), 2011-01-01
Supplement: c0ce00766h.pdf [file c0ce00766h.pdf]

## Electronic Supplementary Information (ESI)

### Novel 3D Lanthanide-Organic Frameworks with an Unusual Infinite Nanosized Ribbon $[\text{Ln}_3(\mu_3\text{-OH})_2(\text{-CO}_2)_6]^+_n$ (Ln = Eu, Gd, Dy): Syntheses, Structures, Luminescence, and Magnetic Properties

Hai-Juan Zhang,<sup>a</sup> Xiao-Zhu Wang,<sup>a</sup> Dun-Ru Zhu,<sup>\*,a,b</sup> You Song,<sup>b</sup> Yan Xu,<sup>\*,a</sup> Heng Xu,<sup>a</sup> Xuan Shen,<sup>a</sup>

Ting Gao,<sup>a</sup> Min-Xue Huang<sup>a</sup>

<sup>a</sup>State Key Laboratory of Materials-oriented Chemical Engineering, College of Chemistry and  
Chemical Engineering, Nanjing University of Technology, Nanjing 210009, P. R. China, <sup>b</sup>State Key  
Laboratory of Coordination Chemistry, Nanjing National Laboratory of Microstructures, School of  
Chemistry and Chemical Engineering, Nanjing University, Nanjing 210093, P. R. China

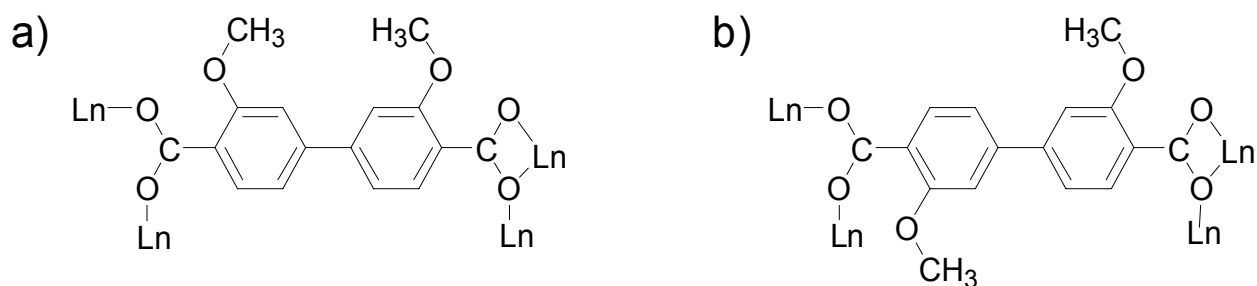

Ln = Eu<sup>3+</sup>, Gd<sup>3+</sup>, Dy<sup>3+</sup>

**Scheme S1** The coordination modes of L ligand in complexes 1-3.

Supplementary Material (ESI) for CrystEngComm  
 Table S1 Selected bond angles (°) for complexes 1-3  
 This journal is © The Royal Society of Chemistry 2011

| 1 <sup>a</sup>                          |            |                                          |            |
|-----------------------------------------|------------|------------------------------------------|------------|
| O1W-Eu1-O2                              | 70.48(15)  | O2W-Eu2-O3                               | 127.31(12) |
| O1W-Eu1-O3                              | 129.53(13) | O2W-Eu2-O5                               | 125.05(12) |
| O1W-Eu1-O11                             | 133.49(13) | O2W-Eu2-O18                              | 64.10(12)  |
| O1W-Eu1-O12                             | 133.33(13) | O2W-Eu2-O19                              | 73.60(13)  |
| O1W-Eu1-O20 <sup>i</sup>                | 72.34(12)  | O2W-Eu2-O13 <sup>v</sup>                 | 137.39(14) |
| O1W-Eu1-O8 <sup>ii</sup>                | 65.69(12)  | O2W-Eu2-O14 <sup>v</sup>                 | 127.50(11) |
| O1W-Eu1-O6 <sup>iii</sup>               | 129.88(13) | O2W-Eu2-O4 <sup>iii</sup>                | 72.01(11)  |
| O1 <sup>iv</sup> -Eu1-O1W               | 79.43(14)  | O2W-Eu2-O6 <sup>iii</sup>                | 77.03(12)  |
| O2-Eu1-O3                               | 144.26(13) | O3-Eu2-O5                                | 77.75(12)  |
| O2-Eu1-O11                              | 76.68(14)  | O3-Eu2-O18                               | 84.05(12)  |
| O2-Eu1-O12                              | 126.01(13) | O3-Eu2-O19                               | 148.85(12) |
| O2-Eu1-O20 <sup>i</sup>                 | 79.28(13)  | O3- Eu2-O13 <sup>v</sup>                 | 93.51(13)  |
| O2-Eu1-O8 <sup>ii</sup>                 | 102.32(14) | O3- Eu2-O14 <sup>v</sup>                 | 71.24(11)  |
| O2-Eu1-O6 <sup>iii</sup>                | 77.17(13)  | O3-Eu2-O4 <sup>iii</sup>                 | 126.59(11) |
| O1 <sup>iv</sup> -Eu1-O2                | 146.56(12) | O3-Eu2-O6 <sup>iii</sup>                 | 69.63(12)  |
| O3-Eu1-O11                              | 96.14(12)  | O5-Eu2-O18                               | 73.30(13)  |
| O3-Eu1-O12                              | 65.95(10)  | O5-Eu2-O19                               | 71.10(13)  |
| O3-Eu1-O20 <sup>i</sup>                 | 131.67(11) | O5-Eu2-O13 <sup>v</sup>                  | 69.52(14)  |
| O3-Eu1-O8 <sup>ii</sup>                 | 70.23(10)  | O5-Eu2-O14 <sup>v</sup>                  | 105.87(12) |
| O3-Eu1-O6 <sup>iii</sup>                | 67.58(11)  | O4 <sup>iii</sup> - Eu2-O5               | 136.90(12) |
| O1 <sup>iv</sup> -Eu1-O3                | 67.83(11)  | O5-Eu2-O6 <sup>iii</sup>                 | 147.37(13) |
| O11-Eu1-O12                             | 51.77(12)  | O18-Eu2-O19                              | 87.07(13)  |
| O11-Eu1-O20 <sup>i</sup>                | 69.89(12)  | O13 <sup>v</sup> -Eu2-O18                | 142.37(14) |
| O8 <sup>ii</sup> -Eu1-O11               | 155.69(12) | O14 <sup>v</sup> -Eu2-O18                | 154.63(12) |
| O6 <sup>iii</sup> -Eu1-O11              | 70.17(11)  | O4 <sup>iii</sup> -Eu2-O18               | 136.08(12) |
| O1 <sup>iv</sup> -Eu1-O11               | 117.11(12) | O6 <sup>iii</sup> -Eu2-O18               | 101.93(12) |
| O12-Eu1-O20 <sup>i</sup>                | 69.77(11)  | O13 <sup>v</sup> -Eu2-O19                | 75.81(13)  |
| O8 <sup>ii</sup> -Eu1-O12               | 131.03(11) | O14 <sup>v</sup> -Eu2-O19                | 117.10(12) |
| O6 <sup>iii</sup> -Eu1-O12              | 96.64(10)  | O4 <sup>iii</sup> -Eu2-O19               | 78.99(12)  |
| O1 <sup>iv</sup> -Eu1-O12               | 66.94(11)  | O6 <sup>iii</sup> -Eu2-O19               | 141.52(12) |
| O8 <sup>ii</sup> -Eu1-O20 <sup>i</sup>  | 134.24(11) | O13 <sup>v</sup> -Eu2-O14 <sup>v</sup>   | 48.27(12)  |
| O6 <sup>iii</sup> -Eu1-O20 <sup>i</sup> | 137.19(11) | O4 <sup>iii</sup> -Eu2-O13 <sup>v</sup>  | 73.61(14)  |
| O1 <sup>iv</sup> -Eu1-O20 <sup>i</sup>  | 77.95(12)  | O6 <sup>iii</sup> -Eu2-O13 <sup>v</sup>  | 112.38(12) |
| O6 <sup>iii</sup> -Eu1-O8 <sup>ii</sup> | 85.82(10)  | O4 <sup>iii</sup> -Eu2-O14 <sup>v</sup>  | 61.60(11)  |
| O1 <sup>iv</sup> -Eu1-O8 <sup>ii</sup>  | 77.28(12)  | O6 <sup>iii</sup> - Eu2-O14 <sup>v</sup> | 64.59(10)  |
| O1 <sup>iv</sup> -Eu1-O6 <sup>iii</sup> | 135.34(11) | O4 <sup>iii</sup> -Eu2-O6 <sup>iii</sup> | 68.58(11)  |
| O3-Eu3-O4                               | 76.60(11)  | O12-Eu3-O17                              | 74.41(12)  |
| O3-Eu3-O6                               | 99.05(11)  | O7 <sup>vi</sup> -Eu3-O12                | 81.83(12)  |
| O3-Eu3-O12                              | 69.21(11)  | O12-Eu3-O14 <sup>vii</sup>               | 138.91(12) |
| O3- Eu3-O17                             | 96.97(12)  | O1 <sup>iv</sup> -Eu3-O12                | 66.30(11)  |
| O3-Eu3-O7 <sup>vi</sup>                 | 142.34(11) | O7 <sup>vi</sup> -Eu3-O17                | 97.85(12)  |
| O3-Eu3-O14 <sup>vii</sup>               | 143.90(12) | O14 <sup>vii</sup> -Eu3-O17              | 77.08(13)  |
| O1 <sup>iv</sup> -Eu3-O3                | 68.91(11)  | O1 <sup>iv</sup> -Eu3-O17                | 140.70(12) |
| O4- Eu3-O6                              | 69.54(11)  | O7 <sup>vi</sup> -Eu3-O14 <sup>vii</sup> | 73.42(13)  |
| O4-Eu3-O12                              | 136.58(11) | O1 <sup>iv</sup> -Eu3-O7 <sup>vi</sup>   | 77.80(11)  |

|                           |            |                                             |            |
|---------------------------|------------|---------------------------------------------|------------|
| O4-Eu3-O17                | 84.30(12)  | O1-Eu3-O14                                  | 135.57(12) |
| O4-Eu3-O7 <sup>vi</sup>   | 139.26(12) | Eu1 <sup>iii</sup> -O1-Eu3 <sup>iii</sup>   | 99.72(12)  |
| O4-Eu3-O14 <sup>vii</sup> | 67.43(12)  | Eu1-O3-Eu2                                  | 108.19(14) |
| O1 <sup>iv</sup> -Eu3-O4  | 124.37(11) | Eu1-O3-Eu3                                  | 101.04(11) |
| O6-Eu3-O12                | 140.58(11) | Eu2-O3-Eu3                                  | 123.09(13) |
| O6-Eu3-O17                | 144.95(12) | Eu1 <sup>iv</sup> -O6-Eu3                   | 121.30(12) |
| O6-Eu3-O7 <sup>vi</sup>   | 88.11(12)  | Eu2 <sup>iv</sup> -O4-Eu3                   | 105.64(11) |
| O6-Eu3-O14 <sup>vii</sup> | 71.62(12)  | Eu1 <sup>iv</sup> -O6-Eu2 <sup>iv</sup>     | 110.70(14) |
| O1 <sup>iv</sup> -Eu3-O6  | 74.34(11)  | Eu1-O12-Eu3                                 | 99.69(11)  |
| Eu2 <sup>iv</sup> -O6-Eu3 | 105.64(11) | Eu2 <sup>viii</sup> -O14-Eu3 <sup>vii</sup> | 92.03(12)  |

**2<sup>b</sup>**

|                                        |            |                                         |            |
|----------------------------------------|------------|-----------------------------------------|------------|
| O1W-Gd1-O2                             | 70.80(18)  | O1W-Gd1-O3                              | 129.20(14) |
| O1W-Gd1-O11                            | 133.57(14) | O1W-Gd1-O12                             | 132.98(14) |
| O1W-Gd1-O20 <sup>i</sup>               | 72.15(13)  | O1W-Gd1-O7 <sup>ii</sup>                | 65.45(14)  |
| O1 <sup>iii</sup> -Gd1-O1W             | 78.96(16)  | O1W-Gd1-O6 <sup>iv</sup>                | 130.61(15) |
| O2-Gd1-O3                              | 144.12(13) | O2-Gd1-O11                              | 76.84(14)  |
| O2-Gd1-O12                             | 126.40(14) | O2-Gd1-O20 <sup>i</sup>                 | 79.29(14)  |
| O2-Gd1-O7 <sup>ii</sup>                | 100.84(15) | O1 <sup>iii</sup> -Gd1-O2               | 146.60(12) |
| O2-Gd1-O6 <sup>iv</sup>                | 77.25(13)  | O3-Gd1-O11                              | 96.30(12)  |
| O3-Gd1-O12                             | 65.92(10)  | O3-Gd1-O20 <sup>i</sup>                 | 131.93(12) |
| O3-Gd1-O7 <sup>ii</sup>                | 70.89(12)  | O1 <sup>iii</sup> -Gd1-O3               | 67.79(11)  |
| O3-Gd1-O6 <sup>iv</sup>                | 67.46(12)  | O11-Gd1-O12                             | 51.92(12)  |
| O11-Gd1-O20 <sup>i</sup>               | 69.80(12)  | O7 <sup>ii</sup> -Gd1-O11               | 155.23(13) |
| O1 <sup>iii</sup> -Gd1-O11             | 117.21(12) | O6 <sup>iv</sup> -Gd1-O11               | 69.93(12)  |
| O12-Gd1-O20 <sup>i</sup>               | 70.01(11)  | O7 <sup>ii</sup> -Gd1-O12               | 132.04(12) |
| O1 <sup>iii</sup> -Gd1-O12             | 66.92(12)  | O6 <sup>iv</sup> -Gd1-O12               | 96.28(11)  |
| O7 <sup>ii</sup> -Gd1-O20 <sup>i</sup> | 134.55(13) | O1 <sup>iii</sup> -Gd1-O20 <sup>i</sup> | 78.21(12)  |
| O6 <sup>iv</sup> -Gd1-O20 <sup>i</sup> | 136.89(12) | O1 <sup>iii</sup> -Gd1-O7 <sup>ii</sup> | 78.41(12)  |
| O6 <sup>iv</sup> -Gd1-O7 <sup>ii</sup> | 85.44(12)  | O1 <sup>iii</sup> -Gd1-O6 <sup>iv</sup> | 135.20(11) |
| O2W-Gd2-O3                             | 127.77(12) | O2W-Gd2-O5                              | 125.24(14) |
| O2W-Gd2-O18                            | 64.27(13)  | O2W-Gd2-O19                             | 73.45(13)  |
| O2W-Gd2-O13                            | 137.44(15) | O2W-Gd2-O14 <sup>v</sup>                | 126.93(13) |
| O2W-Gd2-O4 <sup>iv</sup>               | 71.51(13)  | O2W-Gd2-O6 <sup>iv</sup>                | 76.99(12)  |
| O3-Gd2-O5                              | 77.30(13)  | O3-Gd2-O18                              | 84.14(12)  |
| O3-Gd2-O19                             | 148.68(12) | O3-Gd2-O13 <sup>v</sup>                 | 92.89(13)  |
| O3-Gd2-O14 <sup>v</sup>                | 71.45(11)  | O3-Gd2-O4 <sup>iv</sup>                 | 126.86(11) |
| O3-Gd2-O6 <sup>iv</sup>                | 69.73(12)  | O5-Gd2-O18                              | 73.32(13)  |
| O5-Gd2-O19                             | 71.38(13)  | O5-Gd2-O13 <sup>v</sup>                 | 69.85(15)  |
| O5-Gd2-O14 <sup>v</sup>                | 106.23(12) | O4 <sup>iv</sup> -Gd2-O5                | 137.19(12) |
| O5-Gd2-O6 <sup>iv</sup>                | 147.01(13) | O18-Gd2-O19                             | 87.14(13)  |
| O13 <sup>v</sup> -Gd2-O18              | 142.77(14) | O14 <sup>v</sup> -Gd2-O18               | 154.79(12) |
| O4 <sup>iv</sup> -Gd2-O18              | 135.75(12) | O6 <sup>iv</sup> -Gd2-O18               | 101.61(12) |
| O13 <sup>v</sup> -Gd2-O19              | 76.34(13)  | O14 <sup>v</sup> -Gd2-O19               | 117.03(12) |
| O4 <sup>iv</sup> -Gd2-O19              | 78.82(12)  | O6 <sup>iv</sup> -Gd2-O19               | 141.59(12) |
| O13 <sup>v</sup> -Gd2-O14 <sup>v</sup> | 47.96(13)  | O4 <sup>iv</sup> -Gd2-O13 <sup>v</sup>  | 73.79(14)  |
| O6 <sup>iv</sup> -Gd2-O13 <sup>v</sup> | 112.11(12) | O4 <sup>iv</sup> -Gd2-O14 <sup>v</sup>  | 61.49(11)  |
| O6 <sup>iv</sup> -Gd2-O14 <sup>v</sup> | 64.54(11)  | O4 <sup>iv</sup> -Gd2-O6 <sup>iv</sup>  | 68.82(11)  |
| O3-Gd3-O4                              | 76.76(12)  | O3-Gd3-O6                               | 99.46(12)  |

|                                          |            |                                            |            |
|------------------------------------------|------------|--------------------------------------------|------------|
| O3-Gd3-O12                               | 98.94(11)  | O3-Gd3-O19                                 | 96.59(12)  |
| O3-Gd3-O14 <sup>vi</sup>                 | 144.41(12) | O3-Gd3-O8 <sup>vii</sup>                   | 142.70(12) |
| O1 <sup>iii</sup> -Gd3-O3                | 69.10(11)  | O4-Gd3-O6                                  | 69.42(11)  |
| O4-Gd3-O12                               | 136.42(11) | O4-Gd3-O17                                 | 84.25(12)  |
| O4-Gd3-O14 <sup>vi</sup>                 | 67.82(13)  | O4-Gd3-O8 <sup>vii</sup>                   | 138.92(13) |
| O1 <sup>iii</sup> -Gd3-O4                | 124.42(11) | O6-Gd3-O12                                 | 141.00(11) |
| O6-Gd3-O17                               | 144.81(12) | O6-Gd3-O14 <sup>vi</sup>                   | 71.76(12)  |
| O6-Gd3-O8 <sup>vii</sup>                 | 88.25(12)  | O1 <sup>iii</sup> -Gd3-O6                  | 74.47(11)  |
| O12-Gd3-O17                              | 74.13(12)  | O12-Gd3-O14 <sup>vi</sup>                  | 138.37(12) |
| O8 <sup>vii</sup> -Gd3-O12               | 82.14(12)  | O1 <sup>iii</sup> -Gd3-O12                 | 66.59(11)  |
| O14 <sup>vi</sup> -Gd3-O17               | 76.96(13)  | O8 <sup>vii</sup> -Gd3-O17                 | 97.59(13)  |
| O1 <sup>iii</sup> -Gd3-O17               | 140.71(13) | O8 <sup>vii</sup> -Gd3-O14 <sup>vi</sup>   | 72.66(13)  |
| O1 <sup>iii</sup> -Gd3-O14 <sup>vi</sup> | 135.47(12) | O1 <sup>iii</sup> -Gd3-O8 <sup>vii</sup>   | 78.20(12)  |
| Gd1 <sup>iv</sup> -O1-Gd3 <sup>iv</sup>  | 99.76(12)  | Gd1-O3-Gd2                                 | 108.20(14) |
| Gd1-O3-Gd3                               | 100.85(11) | Gd2-O3-Gd3                                 | 123.33(13) |
| Gd2 <sup>iii</sup> -O4-Gd3               | 102.39(12) | Gd1 <sup>iii</sup> -O6-Gd3                 | 121.17(13) |
| Gd2 <sup>iii</sup> -O6-Gd3               | 105.90(12) | Gd1 <sup>iii</sup> -O6-Gd2 <sup>iii</sup>  | 110.81(14) |
| Gd1-O12-Gd3                              | 99.76(11)  | Gd2 <sup>viii</sup> -O14-Gd3 <sup>vi</sup> | 91.38(12)  |

3<sup>c</sup>

|                                        |            |                                         |            |
|----------------------------------------|------------|-----------------------------------------|------------|
| O1W-Dy1-O2                             | 69.4(2)    | O1W-Dy1-O3                              | 129.6(2)   |
| O1W-Dy1-O11                            | 65.25(19)  | O1W-Dy1-O20                             | 71.9(2)    |
| O1W-Dy1-O7 <sup>i</sup>                | 132.5(2)   | O1W-Dy1-O8 <sup>i</sup>                 | 133.0(2)   |
| O1W-Dy1-O6 <sup>ii</sup>               | 130.1(2)   | O <sup>iii</sup> -Dy1-O1W               | 79.2(2)    |
| O2-Dy1-O3                              | 144.60(19) | O2-Dy1-O11                              | 100.5(2)   |
| O2-Dy1-O20                             | 79.1(2)    | O2-Dy1-O7 <sup>i</sup>                  | 76.6(2)    |
| O2-Dy1-O8 <sup>i</sup>                 | 126.68(19) | O2-Dy1-O6 <sup>ii</sup>                 | 78.06(19)  |
| O1 <sup>iii</sup> -Dy1-O2              | 145.62(19) | O3-Dy1-O11                              | 71.03(17)  |
| O3-Dy1-O20                             | 132.05(18) | O3-Dy1-O7 <sup>i</sup>                  | 97.12(18)  |
| O3-Dy1-O8 <sup>i</sup>                 | 66.40(16)  | O3-Dy1-O6 <sup>ii</sup>                 | 67.22(16)  |
| O1 <sup>iii</sup> -Dy1-O3              | 67.97(17)  | O11-Dy1-O20                             | 133.86(18) |
| O7 <sup>i</sup> -Dy1-O11               | 155.75(18) | O8 <sup>i</sup> -Dy1-O11                | 132.32(17) |
| O6 <sup>ii</sup> -Dy1-O11              | 85.61(16)  | O1 <sup>iii</sup> -Dy1-O11              | 77.66(17)  |
| O7 <sup>i</sup> -Dy1-O20               | 69.83(19)  | O8 <sup>i</sup> -Dy1-O20                | 69.73(18)  |
| O6 <sup>ii</sup> -Dy1-O20              | 137.43(18) | O1 <sup>iii</sup> -Dy1-O20              | 78.23(19)  |
| O7 <sup>i</sup> -Dy1-O8 <sup>i</sup>   | 52.64(18)  | O6 <sup>ii</sup> -Dy1-O7 <sup>i</sup>   | 70.20(18)  |
| O1 <sup>iii</sup> -Dy1-O7 <sup>i</sup> | 118.37(19) | O6 <sup>ii</sup> -Dy1-O8 <sup>i</sup>   | 96.71(16)  |
| O1 <sup>iii</sup> -Dy1-O8 <sup>i</sup> | 67.39(17)  | O1 <sup>iii</sup> -Dy1-O6 <sup>ii</sup> | 135.10(17) |
| O2W-Dy2-O3                             | 128.68(18) | O2W-Dy2-O5                              | 124.58(19) |
| O2W-Dy2-O17                            | 137.3(2)   | O2W-Dy2-O19 <sup>iv</sup>               | 73.3(2)    |
| O2W-Dy2-O14 <sup>v</sup>               | 64.6(2)    | O2W-Dy2-O4 <sup>ii</sup>                | 71.49(18)  |
| O2W-Dy2-O6 <sup>ii</sup>               | 77.30(18)  | O3-Dy2-O5                               | 78.00(18)  |
| O3-Dy2-O17                             | 92.09(19)  | O3-Dy2-O19 <sup>iv</sup>                | 148.93(19) |
| O3-Dy2-O14 <sup>v</sup>                | 84.14(19)  | O3-Dy2-O4 <sup>ii</sup>                 | 126.13(17) |
| O3-Dy2-O6 <sup>ii</sup>                | 69.68(17)  | O5-Dy2-O17                              | 69.7(2)    |
| O5-Dy2-O19 <sup>iv</sup>               | 71.0(2)    | O5-Dy2-O14 <sup>v</sup>                 | 73.3(2)    |
| O4 <sup>ii</sup> -Dy2-O5               | 137.09(18) | O5-Dy2-O6 <sup>ii</sup>                 | 147.63(18) |
| O17-Dy2-O19 <sup>iv</sup>              | 75.8(2)    | O14 <sup>v</sup> -Dy2-O17               | 142.9(2)   |
| O4 <sup>ii</sup> -Dy2-O17              | 74.08(19)  | O6 <sup>ii</sup> -Dy2-O17               | 112.29(18) |

Supplementary Material (ESI) for CrystEngComm  
This journal is © The Royal Society of Chemistry 2011

|                                           |            |                                            |            |
|-------------------------------------------|------------|--------------------------------------------|------------|
| O14 <sup>v</sup> -Dy2-O19 <sup>iv</sup>   | 88.07(19)  | O4 <sup>ii</sup> -Dy2-O19 <sup>iv</sup>    | 78.52(19)  |
| O6 <sup>ii</sup> -Dy2-O19 <sup>iv</sup>   | 141.37(19) | O4 <sup>ii</sup> -Dy2-O14 <sup>v</sup>     | 136.12(19) |
| O6 <sup>ii</sup> -Dy2-O14 <sup>v</sup>    | 101.00(19) | O4 <sup>ii</sup> -Dy2-O6 <sup>ii</sup>     | 68.63(17)  |
| O3-Dy3-O4                                 | 76.82(17)  | O3-Dy3-O6                                  | 99.56(17)  |
| O3-Dy3-O8 <sup>i</sup>                    | 69.13(17)  | O3-Dy3-O13 <sup>v</sup>                    | 96.67(18)  |
| O1 <sup>iii</sup> -Dy3-O3                 | 68.73(17)  | O3-Dy3-O12 <sup>iii</sup>                  | 141.84(17) |
| O3-Dy3-O18 <sup>iii</sup>                 | 145.18(19) | O4-Dy3-O6                                  | 69.57(17)  |
| O4-Dy3-O8 <sup>i</sup>                    | 136.62(17) | O4-Dy3-O13 <sup>v</sup>                    | 83.96(19)  |
| O1 <sup>iii</sup> -Dy3-O4                 | 124.44(18) | O4-Dy3-O12 <sup>iii</sup>                  | 139.88(17) |
| O4-Dy3-O18 <sup>iii</sup>                 | 68.64(18)  | O6-Dy3-O8 <sup>i</sup>                     | 140.94(17) |
| O6-Dy3-O13 <sup>v</sup>                   | 144.58(18) | O1 <sup>iii</sup> -Dy3-O6                  | 74.73(17)  |
| O6-Dy3-O12 <sup>iii</sup>                 | 88.85(18)  | O6-Dy3-O18 <sup>iii</sup>                  | 72.81(18)  |
| O8 <sup>i</sup> -Dy3-O13 <sup>v</sup>     | 74.41(18)  | O1 <sup>iii</sup> -Dy3-O8 <sup>i</sup>     | 66.30(17)  |
| O8 <sup>i</sup> -Dy3-O12 <sup>iii</sup>   | 80.93(17)  | O8 <sup>i</sup> -Dy3-O18 <sup>iii</sup>    | 136.98(18) |
| O1 <sup>iii</sup> -Dy3-O13 <sup>v</sup>   | 140.69(18) | O12 <sup>iii</sup> -Dy3-O13 <sup>v</sup>   | 97.48(19)  |
| O13 <sup>v</sup> -Dy3-O18 <sup>iii</sup>  | 75.88(18)  | O1 <sup>iii</sup> -Dy3-O12 <sup>iii</sup>  | 78.00(17)  |
| O1 <sup>iii</sup> -Dy3-O18 <sup>iii</sup> | 136.27(18) | O12 <sup>iii</sup> -Dy3-O18 <sup>iii</sup> | 72.87(19)  |
| Dy1 <sup>ii</sup> -O1-Dy3 <sup>ii</sup>   | 99.94(18)  | Dy1-O3-Dy2                                 | 108.34(19) |
| Dy1-O3-Dy3                                | 100.41(18) | Dy2-O3-Dy3                                 | 123.5(2)   |
| Dy2 <sup>iii</sup> -O4-Dy3                | 102.71(18) | Dy1 <sup>iii</sup> -O6-Dy3                 | 121.0(2)   |
| Dy2 <sup>iii</sup> -O6-Dy3                | 105.95(19) | Dy1 <sup>iii</sup> -O6-Dy2 <sup>iii</sup>  | 110.83(19) |
| Dy1 <sup>vi</sup> -O8-Dy3 <sup>vi</sup>   | 99.63(18)  |                                            |            |

<sup>a</sup>Symmetry codes: i)  $-1 + x, y, z$ ; ii)  $2 - x, 1/2 + y, 1/2 - z$ ; iii)  $x, 1/2 - y, -1/2 + z$ ; iv)  $x, 1/2 - y, 1/2 + z$ ; v)  $3 - x, 1/2 + y, 1/2 - z$ ; vi)  $2 - x, -y, 1 - z$ ; vii)  $3 - x, -y, 1 - z$ ; viii)  $3 - x, -1/2 + y, 1/2 - z$ . <sup>b</sup>Symmetry codes: i)  $1 + x, y, z$ ; ii)  $-1 - x, y - 1/2, 3/2 - z$ ; iii)  $x, 3/2 - y, z - 1/2$ ; iv)  $x, 3/2 - y, 1/2 + z$ ; v)  $-2 - x, y - 1/2, 3/2 - z$ ; vi)  $-2 - x, 2 - y, 1 - z$ ; vii)  $-1 - x, 2 - y, 1 - z$ ; viii)  $-2 - x, 1/2 + y, 3/2 - z$ . <sup>c</sup>Symmetry codes: i)  $1 - x, y - 1/2, 3/2 - z$ ; ii)  $x, 1/2 - y, z - 1/2$ ; iii)  $x, 1/2 - y, 1/2 + z$ ; iv)  $1 + x, y, z$ ; v)  $2 - x, y - 1/2, 3/2 - z$ ; vi)  $1 - x, 1/2 + y, 3/2 - z$ .

**Table S2** Hydrogen-bonding geometry (Å, °) for complexes **2-3**

| Complexes            | D-H...A                      | d(D-H)  | d(H...A) | d(D...A)  | ∠D-H...A |
|----------------------|------------------------------|---------|----------|-----------|----------|
| <b>2<sup>a</sup></b> | O1W-H1WA...O19 <sup>i</sup>  | 0.86(5) | 2.01(5)  | 2.813(6)  | 155(5)   |
|                      | O1W-H1WA...O13 <sup>ii</sup> | 0.86(5) | 2.44(4)  | 2.961(6)  | 120(4)   |
|                      | O1W-H1WB...O9 <sup>ii</sup>  | 0.87(3) | 2.25(5)  | 3.018(6)  | 148(6)   |
|                      | O2W-H2WA...O3W               | 0.85(5) | 1.93(5)  | 2.742(6)  | 159(5)   |
|                      | O2W-H2WB...O16               | 0.84(5) | 2.21(5)  | 2.992(6)  | 155(5)   |
|                      | C1-H1A...O1W <sup>iii</sup>  | 0.93    | 2.50     | 3.057(9)  | 119      |
|                      | C2-H2A...O19 <sup>iv</sup>   | 0.93    | 2.51     | 3.123(7)  | 124      |
| <b>3<sup>b</sup></b> | O1W-H1WA...O19               | 0.86(6) | 1.91(6)  | 2.769(8)  | 176(12)  |
|                      | O1W-H1WB...O10               | 0.86(5) | 2.37(6)  | 3.020(9)  | 133(7)   |
|                      | O1W-H1WB...O16 <sup>i</sup>  | 0.86(5) | 2.59(8)  | 3.202(9)  | 130(8)   |
|                      | O2W-H2WA...O15 <sup>ii</sup> | 0.85(6) | 2.15(6)  | 2.973(9)  | 161(6)   |
|                      | O2W-H2WB...O3W               | 0.84(6) | 1.98(7)  | 2.740(9)  | 150(6)   |
|                      | C1-H1A...O1W <sup>iii</sup>  | 0.93    | 2.44     | 3.011(11) | 120      |
|                      | C2-H2A...O19 <sup>iv</sup>   | 0.93    | 2.45     | 3.062(11) | 123      |

<sup>a</sup>Symmetry codes: i)  $1 + x, y, z$ ; ii)  $-1 - x, y - 1/2, 3/2 - z$ ; iii)  $x, 3/2 - y, 1/2 + z$ ; iv)  $x, 3/2 - y, z - 1/2$ .

<sup>b</sup>Symmetry codes: i)  $x - 1, y, z$ ; ii)  $2 - x, y - 1/2, 3/2 - z$ ; iii)  $x, 1/2 - y, z - 1/2$ ; iv)  $1 + x, 1/2 - y, 1/2 + z$ .

**Table S3** C–H... $\pi$  /  $\pi$ ... $\pi$  stacking interaction (Å) for complexes **2** and **3**

| Complexes | D–H...A / $\pi$ ... $\pi$               | d(H... $\pi$ ) / d( $\pi$ ... $\pi$ ) | $\angle$ C–H... $\pi$ / dihedral angle |
|-----------|-----------------------------------------|---------------------------------------|----------------------------------------|
| <b>2</b>  | C34–H34C... $\pi$ (C11–16)              | 3.198                                 | 159.2                                  |
|           | C34–H34B... $\pi$ (C21–26) <sup>i</sup> | 3.333                                 | 159.3                                  |
|           | C18–H18C... $\pi$ (C27–32)              | 2.886                                 | 140.6                                  |
|           | C26–H26A... $\pi$ (C27–32) <sup>i</sup> | 3.107                                 | 117.9                                  |
|           | $\pi$ (C5–10)... $\pi$ (C21–26)         | 3.815                                 | 10.8                                   |
| <b>3</b>  | C10–H10A... $\pi$ (C21–26)              | 3.699                                 | 109.9                                  |
|           | C26–H26A... $\pi$ (C5–10)               | 3.484                                 | 117.1                                  |

Symmetry code: i)  $-2 - x, 2 - y, 1 - z$ .

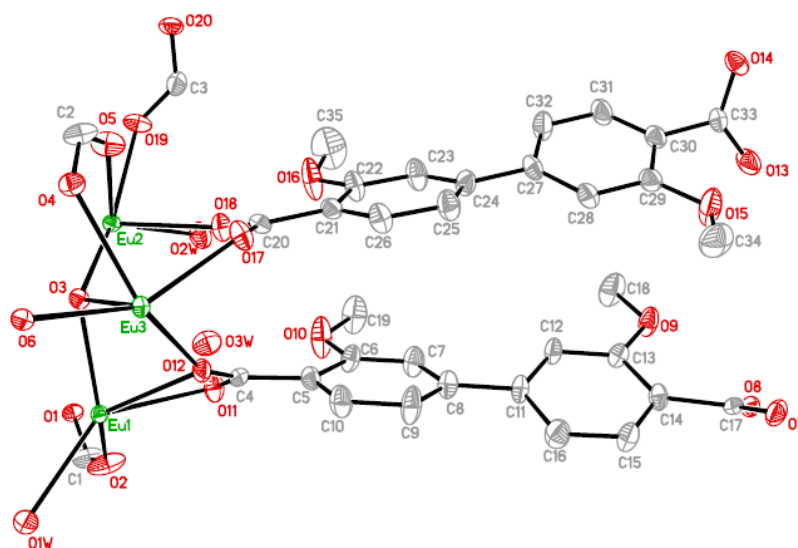

**Fig. S1** ORTEP drawing (at 50% probability) of the asymmetric unit for complex **1**.

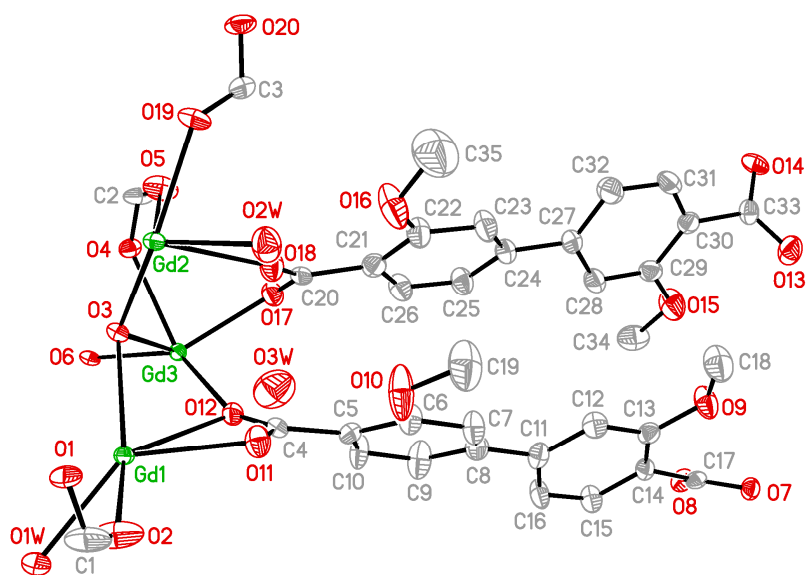

**Fig. S2** ORTEP drawing (at 50% probability) of the asymmetric unit for complex **2**.

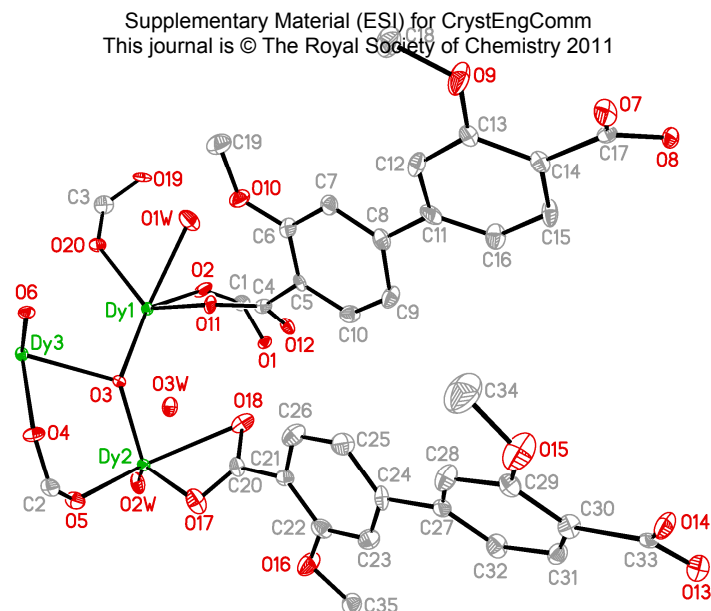

Fig. S3 ORTEP drawing (at 50% probability) of the asymmetric unit for complex 3.

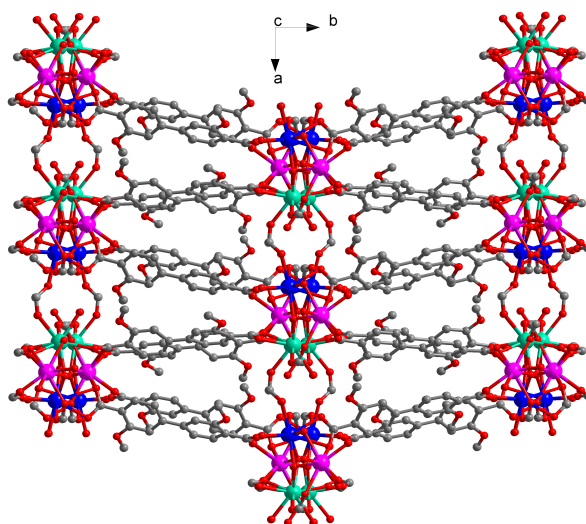

Fig. S4 Ball and stick viewed of 3D framework in 2 from *c* axis.

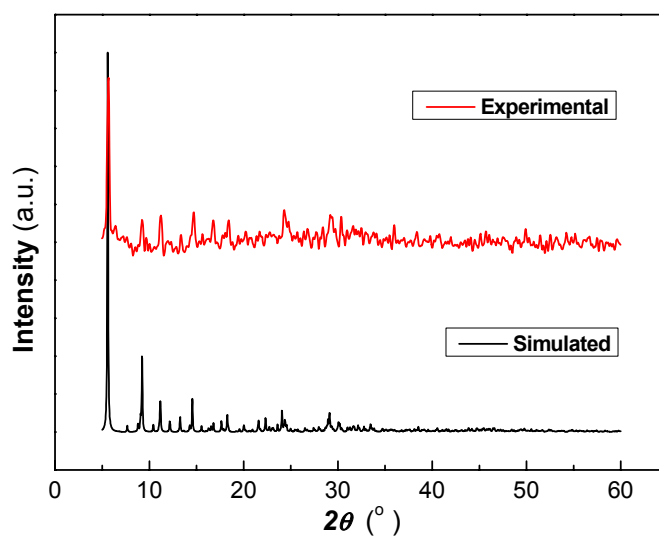

Fig. S5 Experimental and simulated X-ray powder diffraction patterns of complex 1.

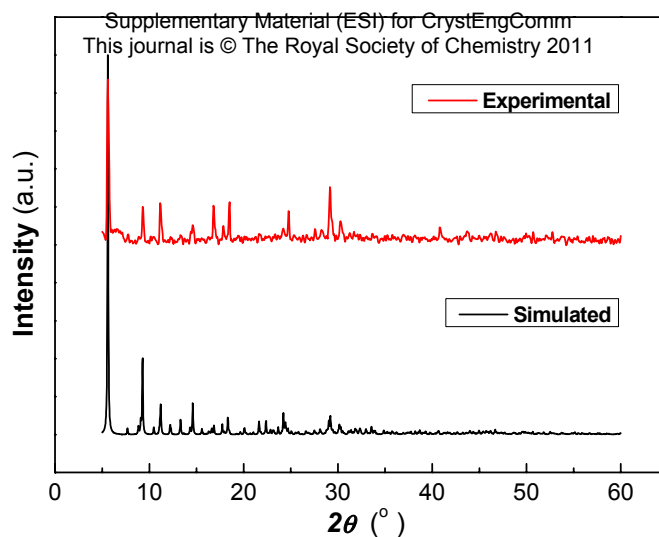

Fig. S6 Experimental and simulated X-ray powder diffraction patterns of complex 2.

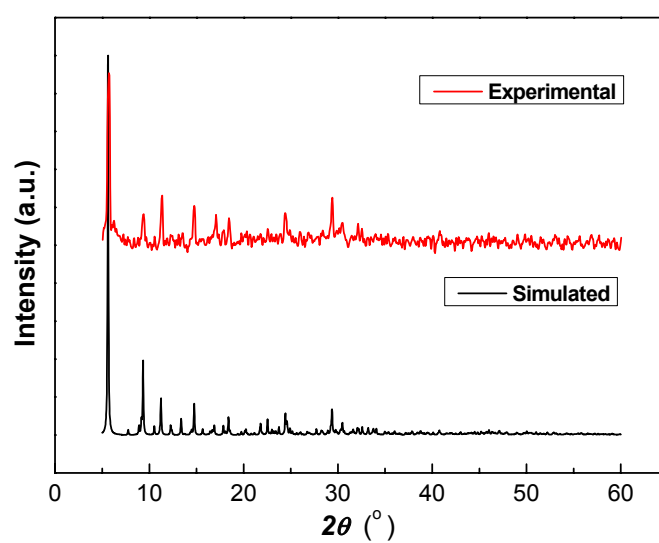

Fig. S7 Experimental and simulated X-ray powder diffraction patterns of complex 3.

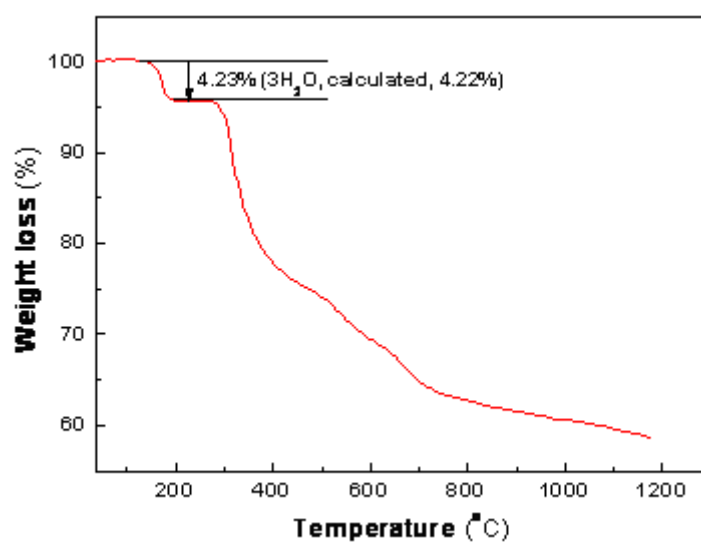

Fig. S8 TGA curve for complex 1.



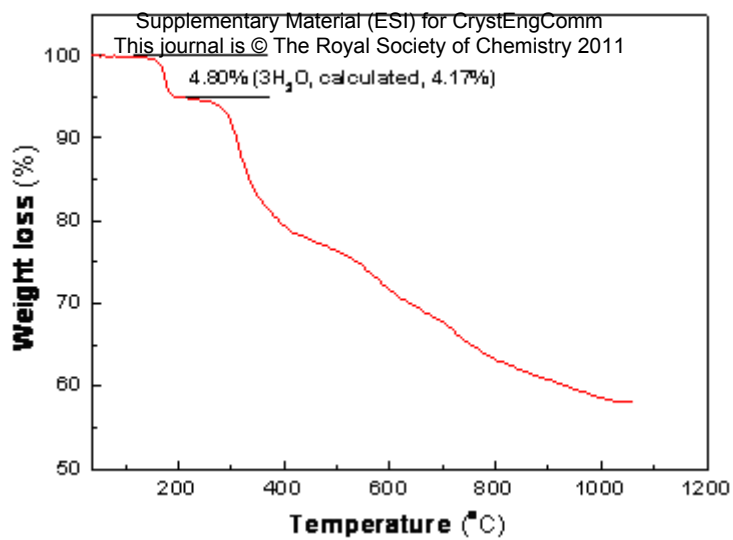

**Fig. S9** TGA curve for complex 2.

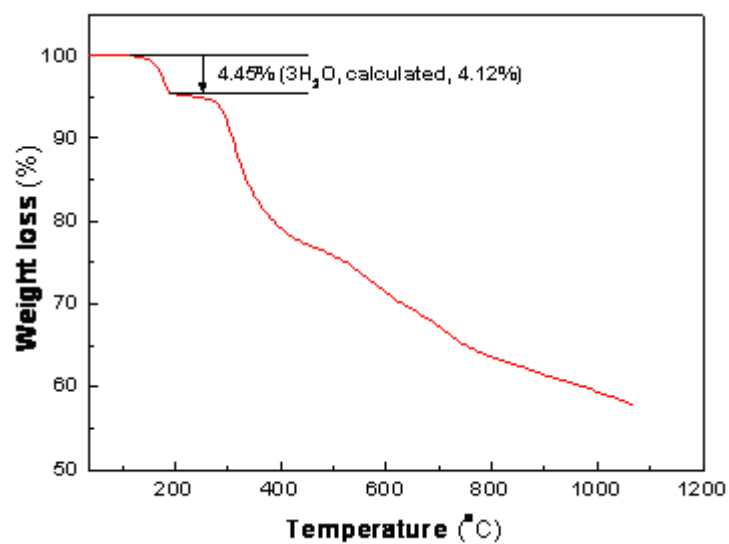

**Fig. S10** TGA curve for complex 3.

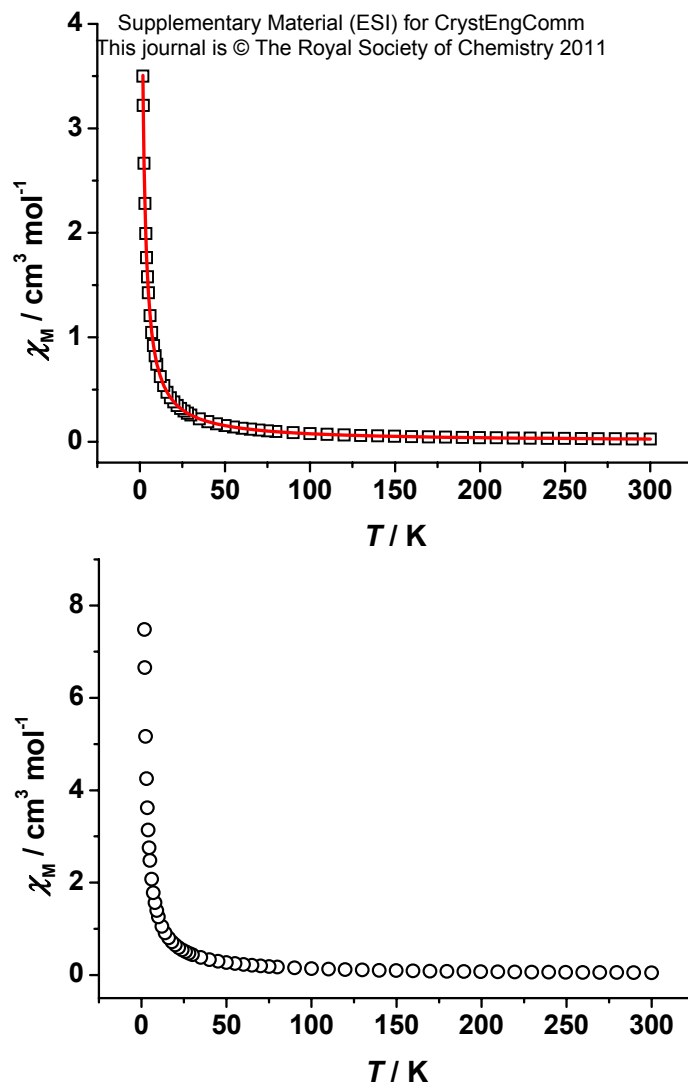

**Fig. S11** Variable-temperature susceptibilities for **2** ( $\square$ ) and **3** ( $\circ$ ) under a field of 100 Oe. The red solid line is the fitting result for **2**.

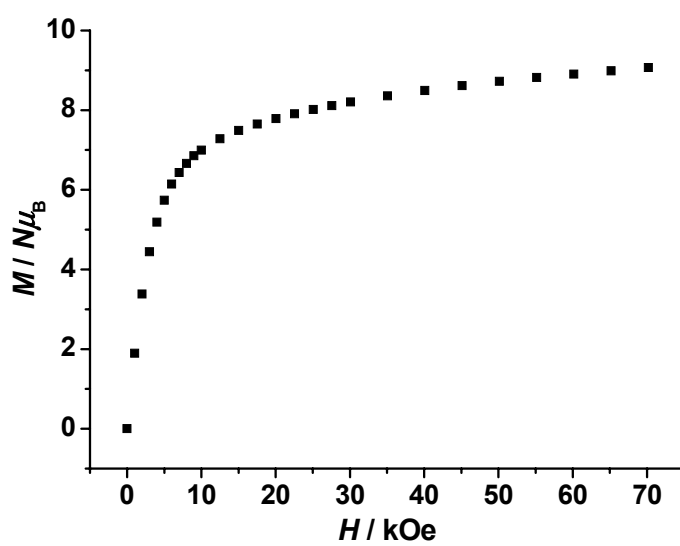

**Fig. S12** M-H plot for **3** at 1.8 K.

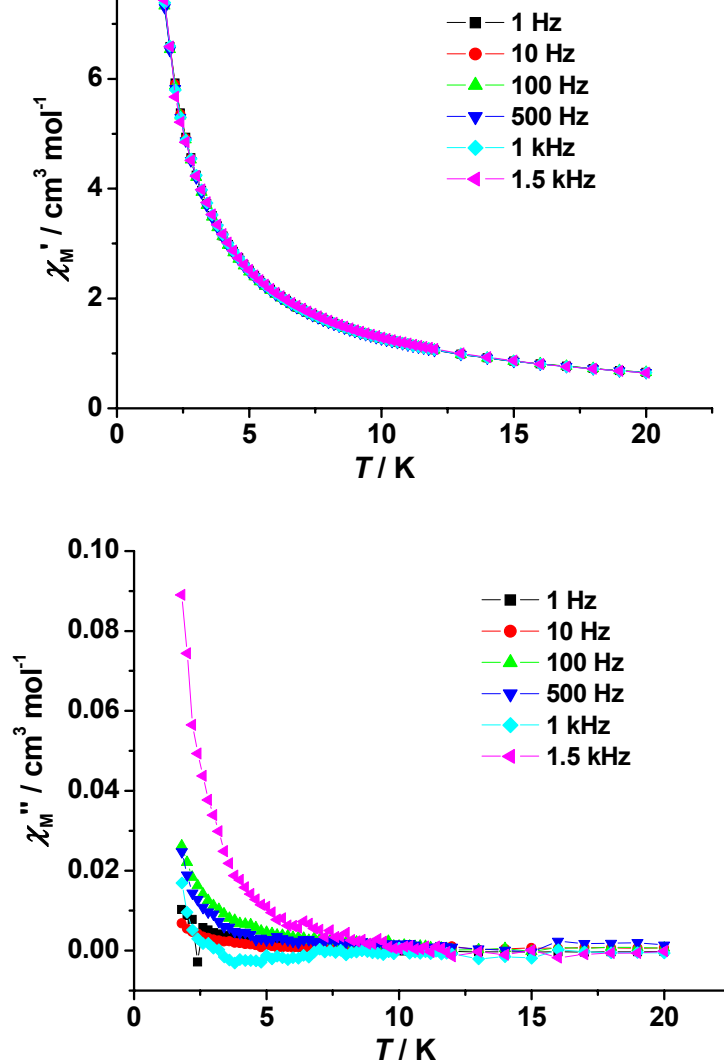

Fig. S13 AC susceptibilities for **3** in  $H_{\text{dc}} = 0$  (top) and  $H_{\text{ac}} = 5$  Oe (bottom).
